# Supplementary material for: Super-Mitobarcoding in Plant Species Identification? It Can Work! The Case of Leafy Liverworts Belonging to the Genus Calypogeia
Source: MDPI journal article supplement (doi:10.3390/ijms232415570), 2022-12-08
Supplement: s1 [file s1]

**Table S2. Species used in this study, sampling data and sequencing results.**

| SPECIES                          | VOUCHER                                                                                                          | geographic coordinates | sequencing results       | MITOGENOME  |               |                          | PLASTOME                 |               |                          |
|----------------------------------|------------------------------------------------------------------------------------------------------------------|------------------------|--------------------------|-------------|---------------|--------------------------|--------------------------|---------------|--------------------------|
|                                  |                                                                                                                  |                        |                          | length [bp] | mean coverage | GenBank accession number | length [bp]              | mean coverage | GenBank accession number |
| <i>Calypogeia arguta</i>         | United Kingdom, coll. D.A.C.; DC1420                                                                             | No data                | Ślipiko et al. 2020 [52] | 159,055     | 229.4         | OM140682                 | Ślipiko et al. 2020 [52] |               |                          |
|                                  | Spain, Galicia, Province Ourense, Serra Do Xurés National Park, coll. A.S.-V. and I.V.; S-V 31365                | 37.50°N, 25.48°W       |                          | 159,061     | 181.2         | MF401630                 |                          |               |                          |
| <i>Calypogeia integristipula</i> | SE Poland, Bieszczady Mts, W slope of Mt Rozsypaniec Wołosacki, 1214 m, coll. K.B.; POZW 41928                   | 49.06°N, 22.77°E       |                          | 163,057     | 80.4          | OM140683                 |                          |               |                          |
|                                  | S Poland, Tatra Mts, valley of Białka stream, 1100 m a.s.l., coll. K.B., A.B.; POZW 40856                        | 49.24°N, 20.10°E       |                          | 163,057     | 143.7         | MF401629                 |                          |               |                          |
| <i>Calypogeia fissa</i>          | W Poland, Lubuskie Province, Biecz forestry, coll. S.R., K.B.; POZW 42306                                        | 51.48°N, 15.10°E       |                          | 162,174     | 169.1         | OM117689                 |                          |               |                          |
|                                  | NW Poland, Pomorskie Province, Lake Małe Sitno near Czarna Dąbrówka, coll. K.B., A.B. POZW 42345                 | 54.16°N, 17.31°E       |                          | 162,175     | 199.1         | MF401632                 |                          |               |                          |
| <i>Calypogeia suecica</i> gr.1   | SE Poland, Bieszczady Mts, Wetlina, valley of Średni Lutowy stream, on soil, 640 m a.s.l., coll. K.B.; POZW41937 | 49.12°N, 22.47°E       |                          | 160,451     | 89.0          | OM140680                 | Ślipiko et al. 2020 [52] |               |                          |

| SPECIES                           | VOUCHER                                                                                                 | geographic coordinates | sequencing results                   | MITOGENOME  |               |                          | PLASTOME                 |               |                          |
|-----------------------------------|---------------------------------------------------------------------------------------------------------|------------------------|--------------------------------------|-------------|---------------|--------------------------|--------------------------|---------------|--------------------------|
|                                   |                                                                                                         |                        |                                      | length [bp] | mean coverage | GenBank accession number | length [bp]              | mean coverage | GenBank accession number |
|                                   | SE Poland, Bieszczady Mts, Wetlina, valley of Górna Solinka stream,, 680 m a.s.l., coll. K.B. POZW41930 | 49.14N, 22.48E         | <b>19,325,216 paired 150bp reads</b> | 160,433     | 44.9          | OP526745                 | <b>119,977</b>           | 120.1         | OP526752                 |
|                                   | S Poland, Tatry Mts, NE slope of Skupinów Uplaz Mt, 1200 m a.s.l., coll. K.B., A.B. POZW43102           | 49.26N, 19.99E         | <b>19,359,240 paired 150bp reads</b> | 160,440     | 118.3         | OP526748                 | <b>119,960</b>           | 304.5         | OP526753                 |
| <i>Calypogeia suecica</i><br>gr.2 | SE Poland, Beskid Sądecki Mts, Potok Czarny stream, 717 m, coll. K.B. POZW 42366                        | 49.26°N, 20.28°E       | Ślipiko et al. 2020 [52]             | 161,960     | 101.7         | NC_035979                | Ślipiko et al. 2020 [52] |               |                          |
|                                   | S Poland, Pieniny Mts, valley of Limbargowy stream, 760 m a.s.l., coll. K.B. POZW43100                  | 49.42N, 20.37E         | <b>18,033,798 paired 150bp reads</b> | 161,975     | 65.4          | OP526747                 | <b>120,116</b>           | 199.8         | OP526750                 |
|                                   | SE Poland, Bieszczady Mts, Wetlina, valley of Górna Solinka stream, 772 m a.s.l., coll. K.B. POZW41936  | 49.14N, 22.48E         | <b>18,487,662 paired 150bp reads</b> | 161,975     | 78.4          | OP526746                 | <b>120,117</b>           | 233.1         | OP526751                 |
| <i>Calypogeia neesiana</i>        | S Poland, Tatra Mts, N slope of Mt Ornak, 1680 m, coll. K.B., A.B. POZW 41731                           | 49.13°N, 19.50°E       | Ślipiko et al. 2020 [52]             | 163,324     | 92.3          | OM140681                 | Ślipiko et al. 2020 [52] |               |                          |
|                                   | SE Poland, Bieszczady Mts, W slope of Mt Tarmica, 1280 m, coll. K.B.; POZW 41952                        | 49.05°N, 22.44°E       |                                      | 163,324     | 41.2          | OP554114                 |                          |               |                          |
| <i>Calypogeia azurea</i>          | S Poland, Tatra Mts, NE slope of Skupinów Uplaz                                                         | 49.27°N, 19.99°E       |                                      | 162,031     | 192.4         | OM140676                 |                          |               |                          |

| SPECIES                       | VOUCHER                                                                                                          | geographic coordinates | sequencing results       | MITOGENOME  |               |                          | PLASTOME                 |               |                          |
|-------------------------------|------------------------------------------------------------------------------------------------------------------|------------------------|--------------------------|-------------|---------------|--------------------------|--------------------------|---------------|--------------------------|
|                               |                                                                                                                  |                        |                          | length [bp] | mean coverage | GenBank accession number | length [bp]              | mean coverage | GenBank accession number |
|                               | Mt, 1200 m, coll. K.B., A.B.; POZW 41372                                                                         |                        | Ślipiko et al. 2020 [52] |             |               |                          | Ślipiko et al. 2020 [52] |               |                          |
|                               | S Poland, Tatra Mts, Rów Zakopiański at N base of Tatra Mts, 971 m, coll. A.B., K.B.; POZW 41388                 | 49.31°N, 20.05°E       |                          | 162,033     | 105.7         | OM140675                 |                          |               |                          |
| <i>Calypogeia sphagnicola</i> | NW Poland, Pomorskie Province, Lake Wałachy near Kościerzyna, coll. K.B., A.B.; POZW 42243                       | 54.00°N, 17.57°E       |                          | 160,890     | 36.5          | OM140679                 |                          |               |                          |
|                               | S Poland, Row Zakopiański at N base of Tatra Mts, 971 m, coll. K.B., A.B.; POZW 41695                            | 49.31°N, 20.05°E       |                          | 160,890     | 50.1          | OP526749                 |                          |               |                          |
| <i>Calypogeia paludosa</i>    | S Poland, Tatra Mts, lake Toporowy Staw Wyżni, coll. K.B., A.B. POZW 41142                                       | 49.16°N, 20.01°E       |                          | 162,096     | 177.1         | OM140674                 |                          |               |                          |
|                               | S Poland, Tatra Mts, E slope of Mt. Żółta Turnia, 1,687 m, coll. K.B., A.B. POZW 41178                           | 49.14°N, 20.00°E       |                          | 162,096     | 77.8          | OM140673                 |                          |               |                          |
|                               | S Poland, Tatra Mts, Pańszczyca Valley, peat bog Wielka Pańszczycka Młaka, 1,274 m a.s.l. K.B., A.B.; POZW 41173 | No data                |                          | 162,126     | 65.6          | OM140671                 |                          |               |                          |
| <i>Calypogeia muelleriana</i> | W Poland, Lubuskie Province, Biecz forestry, coll. S.R., K.B. POZW 42318                                         | 51.48°N, 15.10°E       |                          | 162,842     | 10,078.6      | OM140672                 |                          |               |                          |

| SPECIES                   | VOUCHER                                                                                | geographic coordinates | sequencing results       | MITOGENOME  |               |                          | PLASTOME                 |               |                          |
|---------------------------|----------------------------------------------------------------------------------------|------------------------|--------------------------|-------------|---------------|--------------------------|--------------------------|---------------|--------------------------|
|                           |                                                                                        |                        |                          | length [bp] | mean coverage | GenBank accession number | length [bp]              | mean coverage | GenBank accession number |
| <i>Calypogeia azorica</i> | NW Poland, Pomorskie Province, Lake Orle near Miastko, coll. K.B., A.B. POZW 41346     | 54.01°N, 17.04°E       | Ślipiko et al. 2020 [52] | 162,913     | 48.8          | OM140669                 | Ślipiko et al. 2020 [52] |               |                          |
|                           | NW Poland, Pomorskie Province, Lake Lubygość near Kartuzy, coll. K.B., A.B. POZW 42220 | 54.24°N, 17.59°E       |                          | 162,909     | 100.8         | OM140670                 |                          |               |                          |
|                           | Portugal, Azores, Sao Miguel Island, coll. A.S.-V. and I.V. S-V 29154                  | 37.50°N, 25.48°W       |                          | 161,851     | 176.2         | OM140677                 |                          |               |                          |
|                           | Portugal, Azores, Sao Miguel Island, coll. A.S.-V. and I.V. S-V 29425                  | 37.44°N, 25.18°W       |                          | 161,848     | 69.9          | OM140678                 |                          |               |                          |

**Collectors:** A.B. – Alina Bączkiewicz, A.S. – A. Sloga, A.S.-V. – Alfons Schäfer-Verwimp, I.V. – I. Verwimp, K.B. – Katarzyna Buczkowska, D.A.C. – Des A. Callaghan, D.Q. – D. Quandt, S.R. – Stanisław Rosadziński; **Herbaria:** DC – Herb. D. A. Callaghan, POZW – Herbarium of Adam Mickiewicz University, S -V – Herb. Schäfer-Verwimp
